# Supplementary material for: Phase separated structures in tethered dPS–PMMA copolymer films revealed using X-ray scattering with a novel contrast enhancement agent
Source: Royal Society of Chemistry journal article supplement (doi:10.1039/c0py00289e), 2010-11-10
Supplement: c0py00289e.pdf [file c0py00289e.pdf]

## Supporting Information

### Atomic Force Microscopy Images

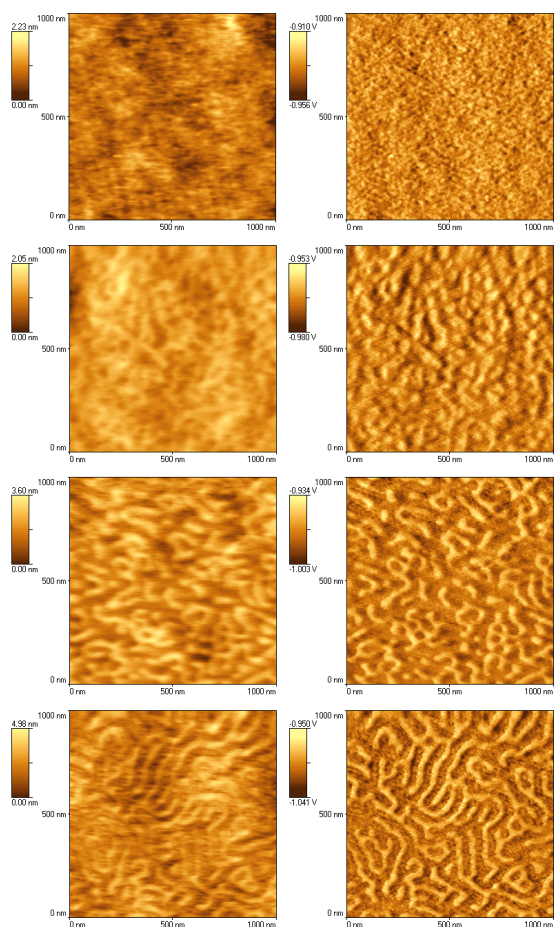

AFM topographic (left) and phase (right) images of the native AC films (*from top to bottom*): AC-0.10, AC-0.19, AC-0.24, and AC-0.45.

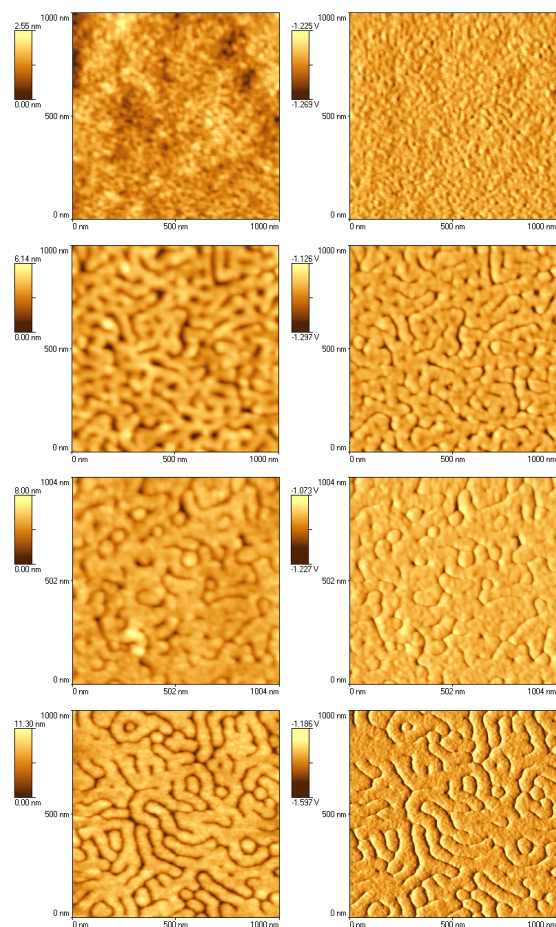

AFM topographic (left) and phase (right) images of the RuO<sub>4</sub> treated AC films (*from top to bottom*): AC-0.10, AC-0.19, AC-0.24, and AC-0.45.

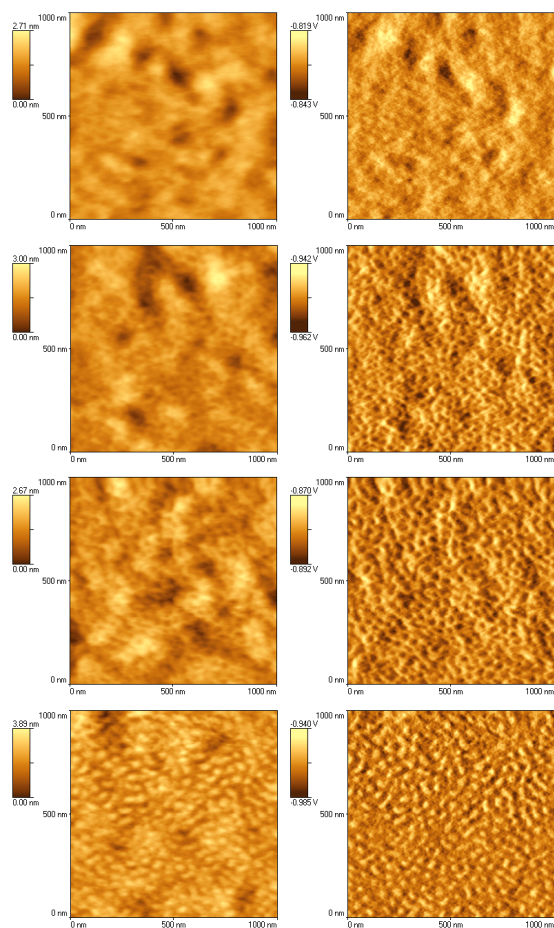

AFM topographic (left) and phase (right) images of the native TA films (*from top to bottom*): TA-0.10, TA-0.19, TA-0.24, and TA-0.45

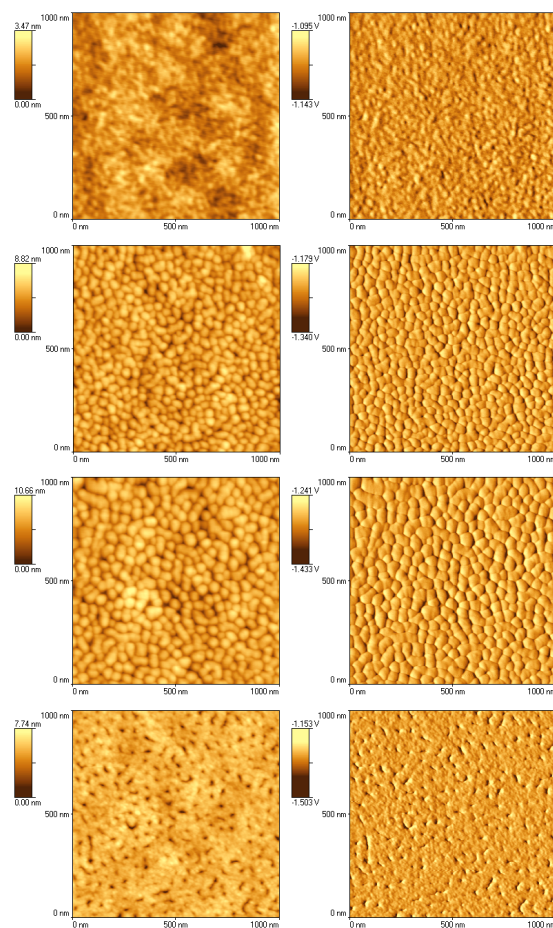

AFM topographic (left) and phase (right) images of the RuO<sub>4</sub> treated TA films (*from top to bottom*): TA-0.10, TA-0.19, TA-0.24, and TA-0.45

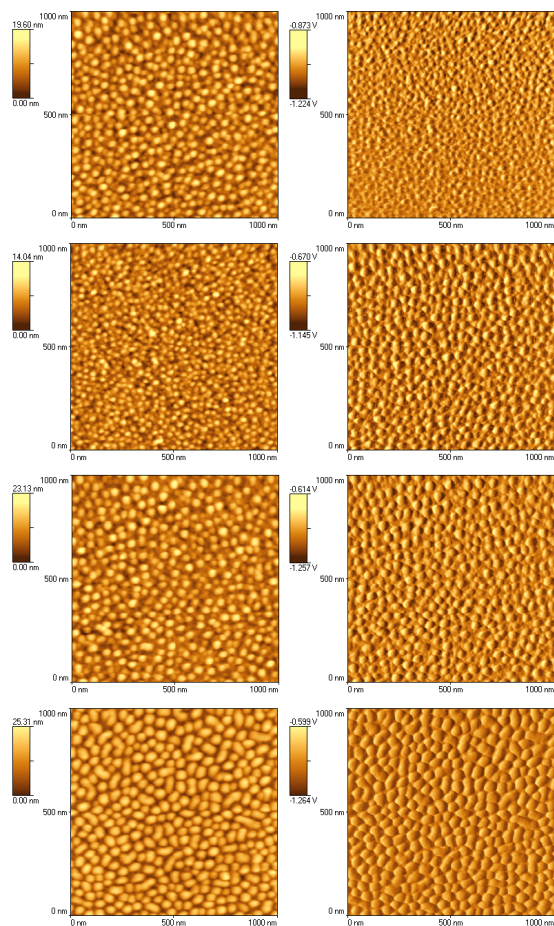

AFM topographic (left) and phase (right) images of the native SEA films (from top to bottom): SEA-0.10, SEA-0.19, SEA-0.24, and SEA-0.45

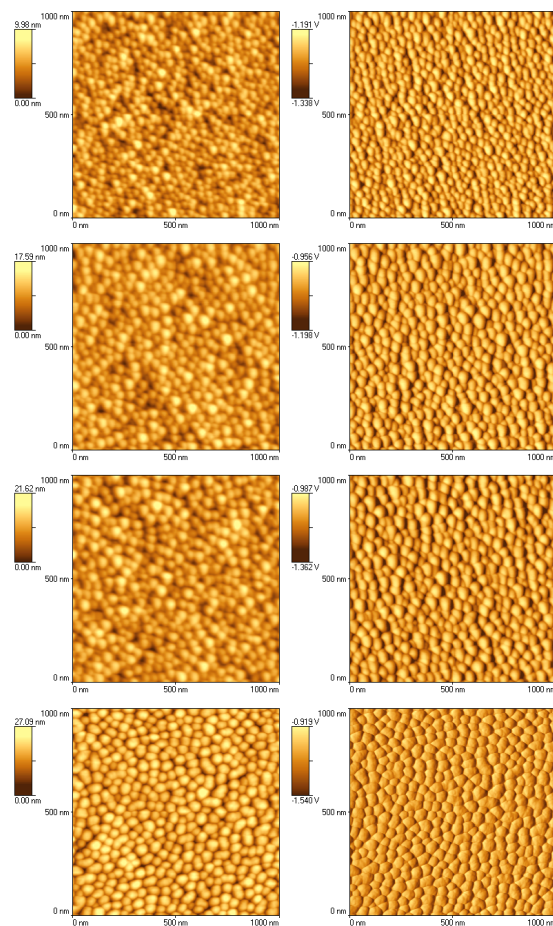

AFM topographic (left) and phase (right) images of the RuO<sub>4</sub> treated SEA films (from top to bottom): SEA-0.10, SEA-0.19, SEA-0.24, and SEA-0.45

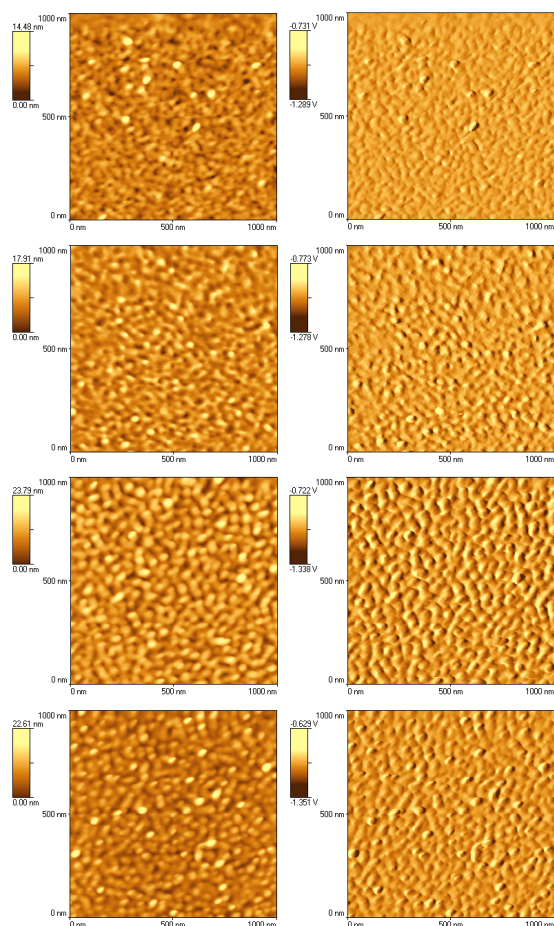

AFM topographic (left) and phase (right) images of the native SEC films (from top to bottom): SEC-0.10, SEC-0.19, SEC-0.24, and SEC-0.45

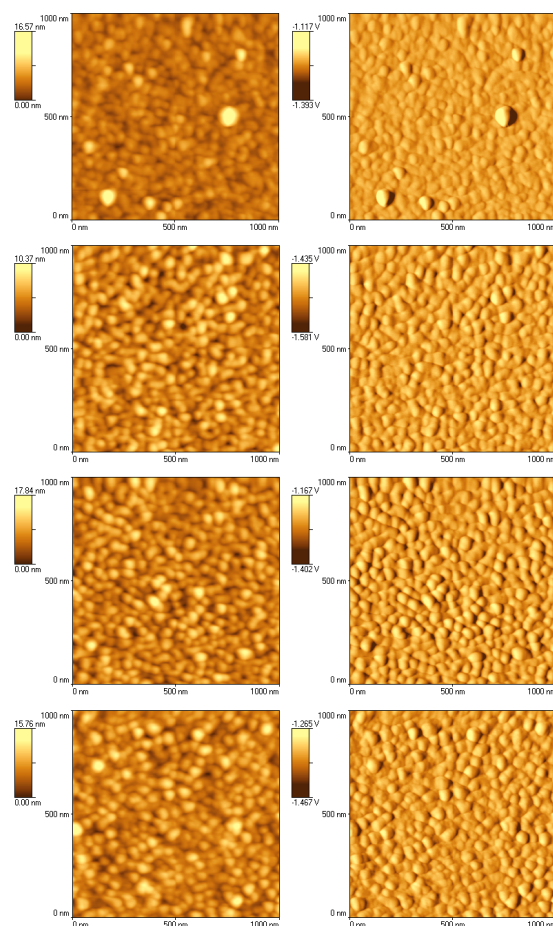

AFM topographic (left) and phase (right) images of the RuO<sub>4</sub> treated SEC films (from top to bottom): SEC-0.10, SEC-0.19, SEC-0.24, and SEC-0.45

### X-ray Reflectometry Profiles

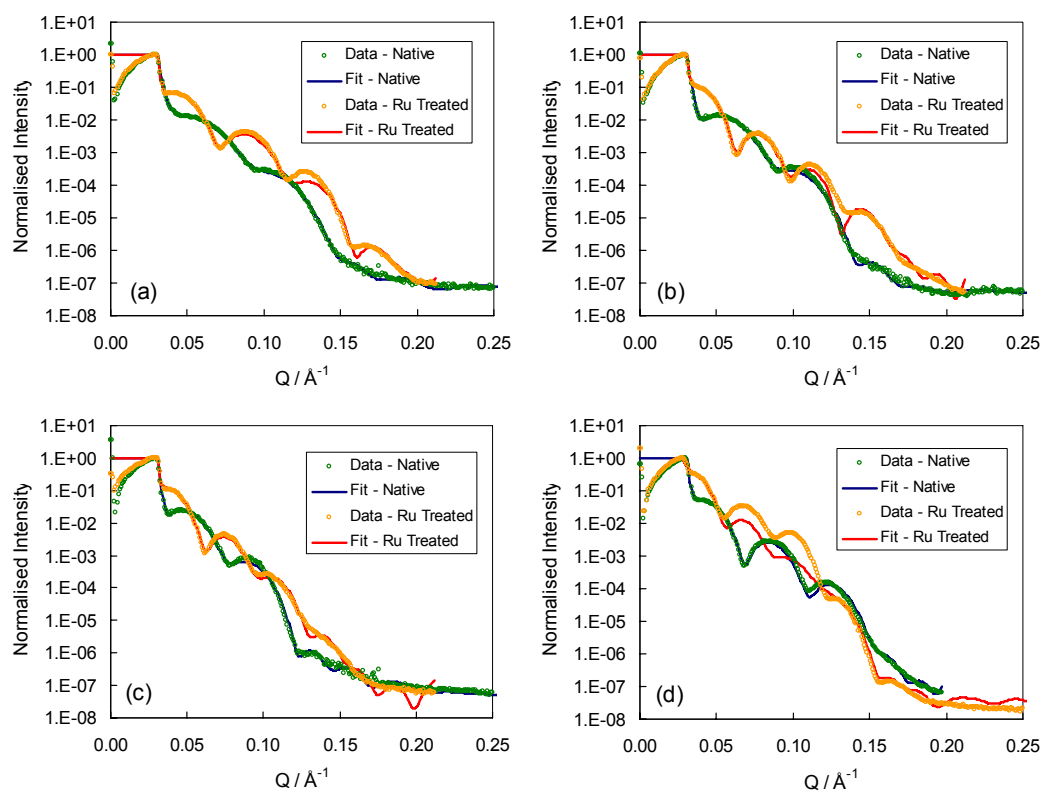

XR profiles of the native and RuO<sub>4</sub> treated TA films: (a) TA-0.10, (b) TA-0.19, (c) TA-0.20, and (d) TA-0.45

### Ellipsometry Results

| Film                                 | MSE   | Thickness    | A             | B                | Non-Uni      |
|--------------------------------------|-------|--------------|---------------|------------------|--------------|
| <i>Native Films</i>                  |       |              |               |                  |              |
| AC-0.10                              | 13.06 | 64.94 ± 0.36 | 1.492 ± 0.006 | 0.0022 ± 0.0008  | –            |
| AC-0.19                              | 7.634 | 65.82 ± 0.09 | 1.501 ± 0.002 | 0.0039 ± 0.0005  | –            |
| AC-0.24                              | 6.576 | 73.99 ± 0.07 | 1.512 ± 0.002 | 0.0035 ± 0.0003  | –            |
| AC-0.45                              | 9.587 | 68.39 ± 0.15 | 1.599 ± 0.005 | -0.0054 ± 0.0011 | –            |
| TA-0.10                              | 7.272 | 7.32 ± 0.02  | 1.52          | 0.001            | –            |
| TA-0.19                              | 7.300 | 9.42 ± 0.02  | 1.52          | 0.001            | –            |
| TA-0.24                              | 5.766 | 11.20 ± 0.01 | 1.52          | 0.001            | –            |
| TA-0.45                              | 13.02 | 14.48 ± 0.04 | 1.52          | 0.001            | –            |
| SEA-0.10                             | 4.692 | 8.72 ± 0.03  | 1.52          | 0.001            | –            |
| SEA-0.19                             | 4.405 | 11.42 ± 0.03 | 1.52          | 0.001            | –            |
| SEA-0.24                             | 7.108 | 11.46 ± 0.04 | 1.52          | 0.001            | –            |
| SEA-0.45                             | 5.053 | 14.29 ± 0.04 | 1.52          | 0.001            | –            |
| SEC-0.10                             | 6.040 | 12.99 ± 0.04 | 1.52          | 0.001            | –            |
| SEC-0.19                             | 4.900 | 13.04 ± 0.03 | 1.52          | 0.001            | –            |
| SEC-0.24                             | 6.753 | 13.59 ± 0.04 | 1.52          | 0.001            | –            |
| SEC-0.45                             | 5.831 | 14.57 ± 0.03 | 1.52          | 0.001            | –            |
| <i>RuO<sub>4</sub> Treated Films</i> |       |              |               |                  |              |
| AC-0.10                              | 14.42 | 60.06 ± 0.35 | 1.450 ± 0.016 | 0.0332 ± 0.0037  | 15.22 ± 2.12 |
|                                      |       | 8.85 ± 0.34  | 1.952 ± 0.348 | -0.0903 ± 0.0882 |              |
| AC-0.19                              | 12.11 | 58.32 ± 0.27 | 1.449 ± 0.013 | 0.0427 ± 0.0403  | 19.94 ± 0.96 |
|                                      |       | 13.60 ± 0.30 | 1.832 ± 0.161 | -0.0754 ± 0.0461 |              |
| AC-0.24                              | 18.31 | 48.78 ± 0.38 | 1.377 ± 0.028 | 0.0705 ± 0.0087  | 10.65 ± 0.83 |
|                                      |       | 29.70 ± 0.39 | 1.792 ± 0.070 | -0.0396 ± 0.0154 |              |
| AC-0.45                              | 1.509 | 62.05 ± 0.38 | 1.493 ± 0.021 | 0.0486 ± 0.0060  | 25.89 ± 1.37 |
|                                      |       | 12.50 ± 0.40 | 2.222 ± 0.329 | -0.1810 ± 0.0928 |              |
| TA-0.10                              | 13.34 | 13.12 ± 0.14 | 1.652 ± 0.028 | -0.0083 ± 0.0036 | –            |
| TA-0.19                              | 12.08 | 13.36 ± 0.09 | 1.772 ± 0.028 | -0.0175 ± 0.0046 | –            |
| TA-0.24                              | 11.59 | 15.28 ± 0.10 | 1.689 ± 0.021 | -0.0085 ± 0.0034 | –            |
| TA-0.45                              | 15.55 | 19.11 ± 0.12 | 1.719 ± 0.022 | -0.0113 ± 0.0039 | –            |

MSE is the mean square error, Thickness refers to the thickness of the Cauchy layer used in the model, which had first and second coefficients of A and B. Non-Uni refers to the thickness non-uniformity of the sample (0% equates to a perfectly smooth surface).

For the AC films treated with RuO<sub>4</sub> the data could only be fitted using two Cauchy layers. The first layer is closer to the substrate and the second layer closer to the air/film surface.

### EDX Spectrum

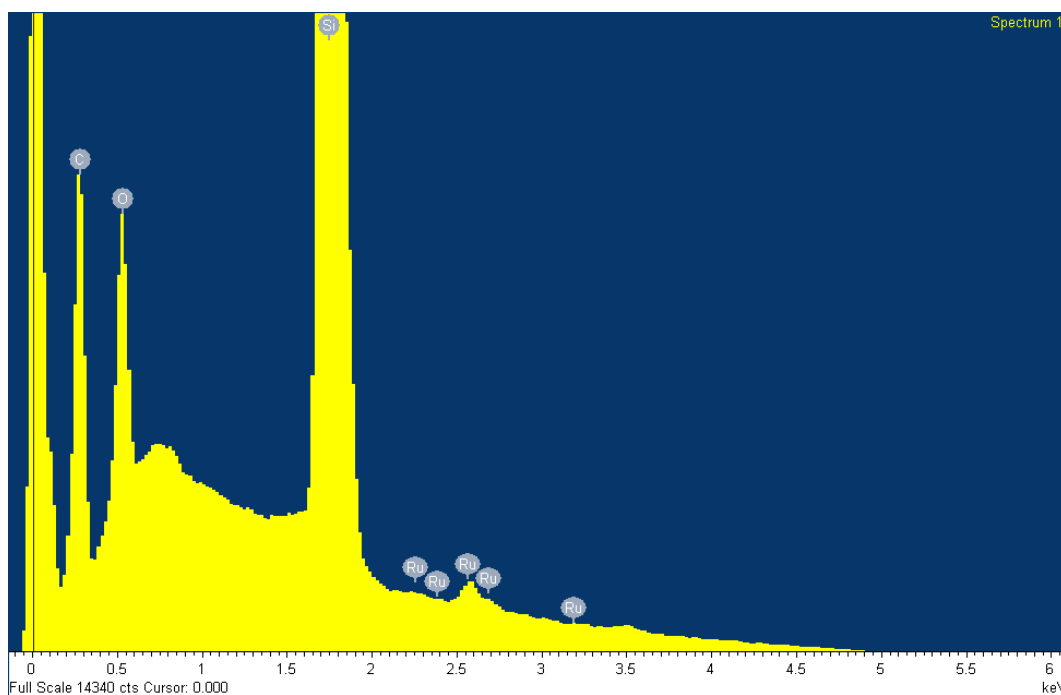

Sample EDX spectrum ( $\text{RuO}_4$  treated TA-0.45) showing the carbon, oxygen, silicon and ruthenium peaks.
